# Supplementary material for: Correction of Skin Contour Defects in Leaking Stomas by Filler Injection: A Novel Approach for a Difficult Clinical Problem
Source: Springer Nature journal article supplement (doi:10.1007/s13555-014-0058-x), 2014-07-08
Supplement: MOESM1 [file 9271042]

- Leakage of stoma contents is common within the ostomate population.
- Stoma leakage can result from skin contour defects and may present to the dermatologist.
- Injection of synthetic fillers may resolve skin contour defects and improve leakage.
- Temporary or permanent filler materials can be used.
- Injection is well tolerated in the outpatient setting.

This summary slide represents the opinions of the authors. No funding or sponsorship was received for this study or publication of this article. For a full list of acknowledgments and conflicts of interest for all authors of this article, please see the full text online. Copyright © The Author(s). Creative Commons Attribution Noncommercial License (CC BY-NC).
